# Supplementary material
Source: publisher figshare collection journal article supplement (https://springernature.figshare.com/ndownloader/files/7234106)

Figure S2a

Domain architecture of class C GPCRs in *Neocallimastix californiae* (Nc)

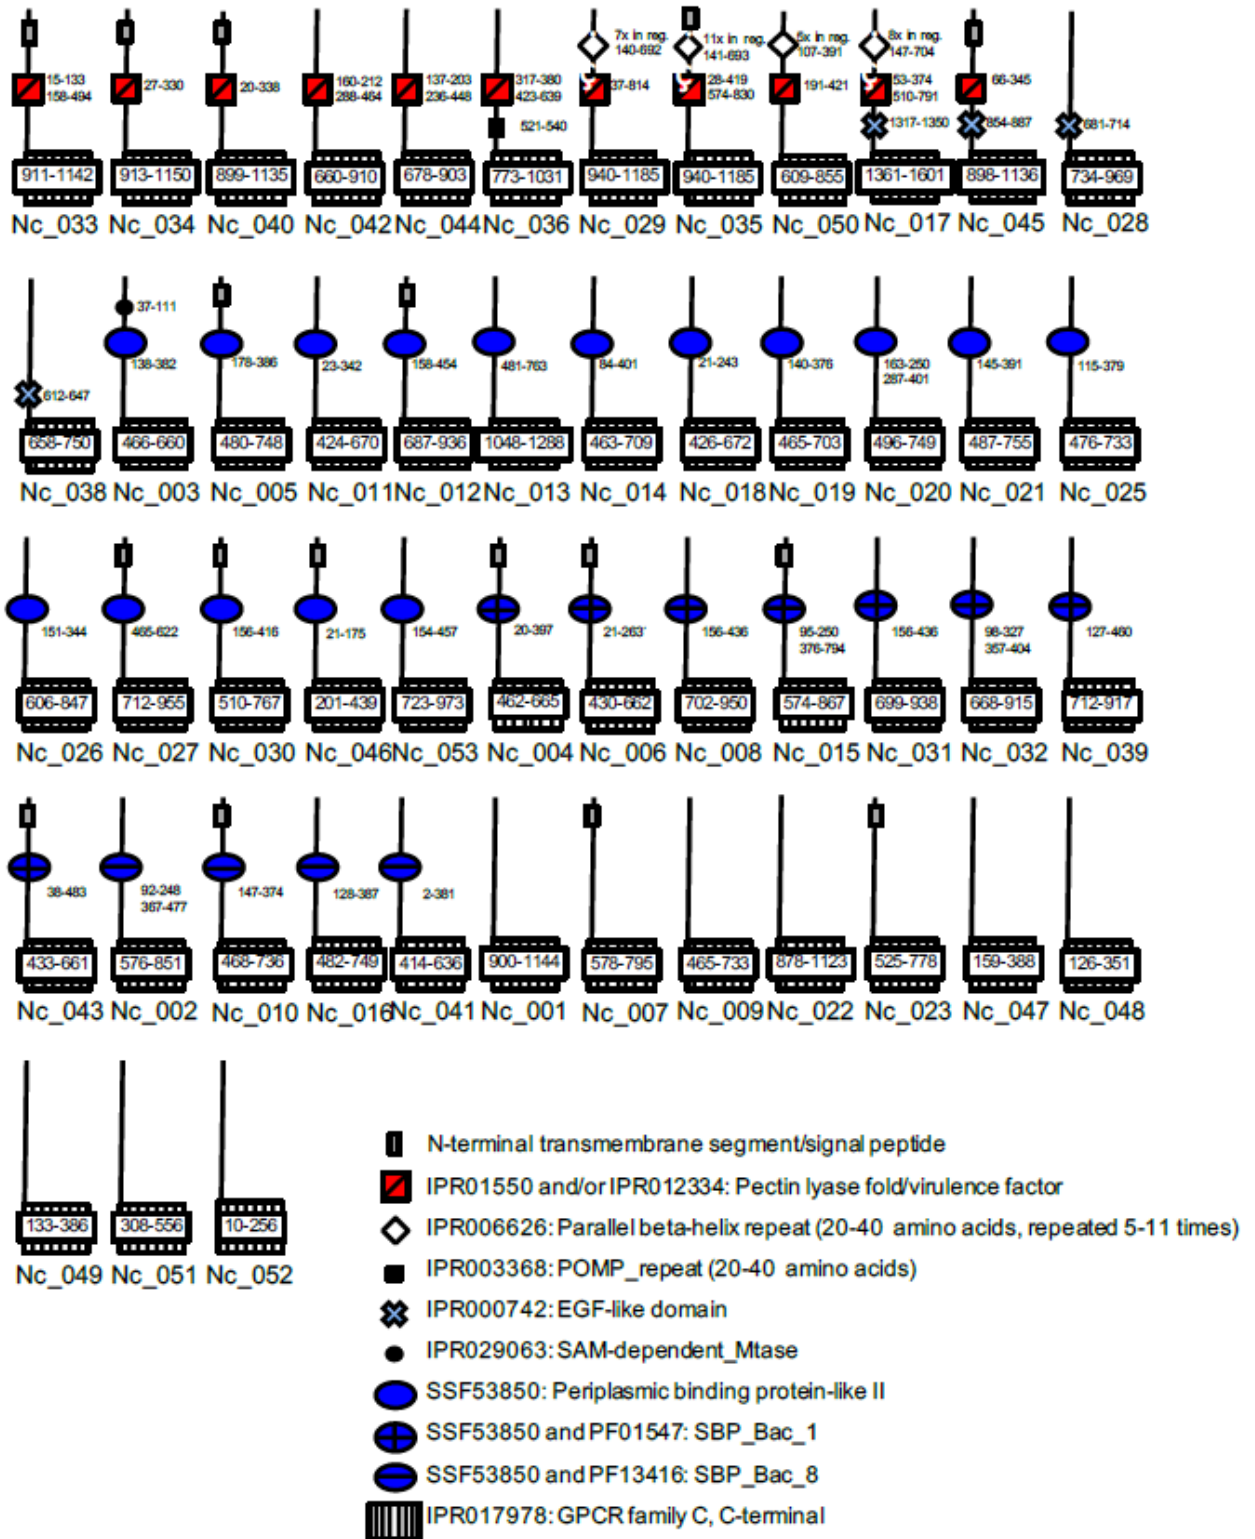

**Figure S2b**

### Domain architecture of class C GPCRs in *Anaeomyces robustus* (Ar)

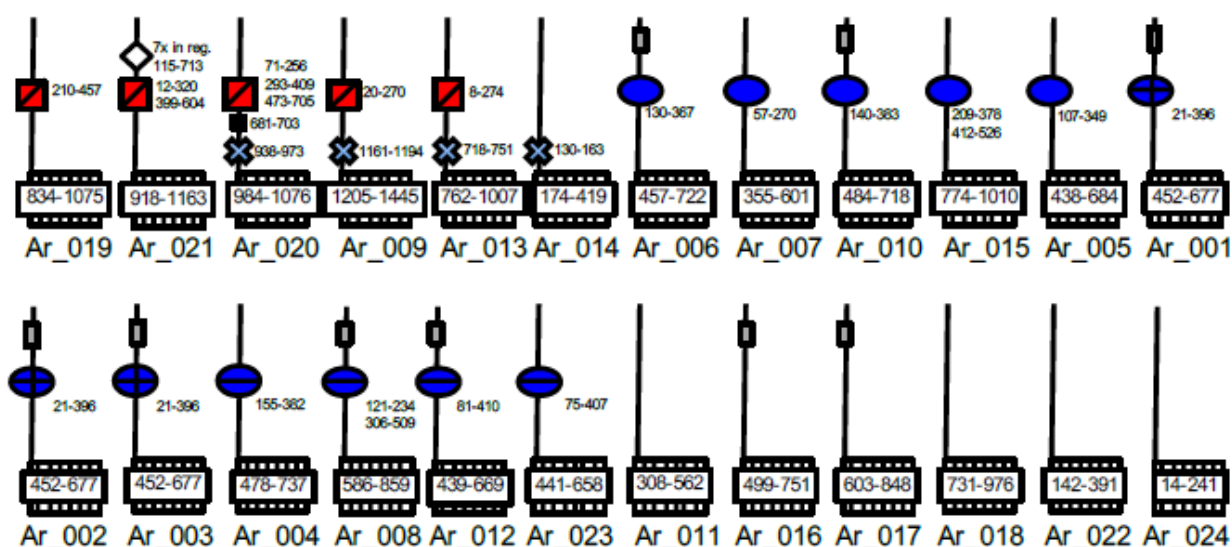

### Domain architecture of class C GPCRs in *Piromyces finnis* (Pf)

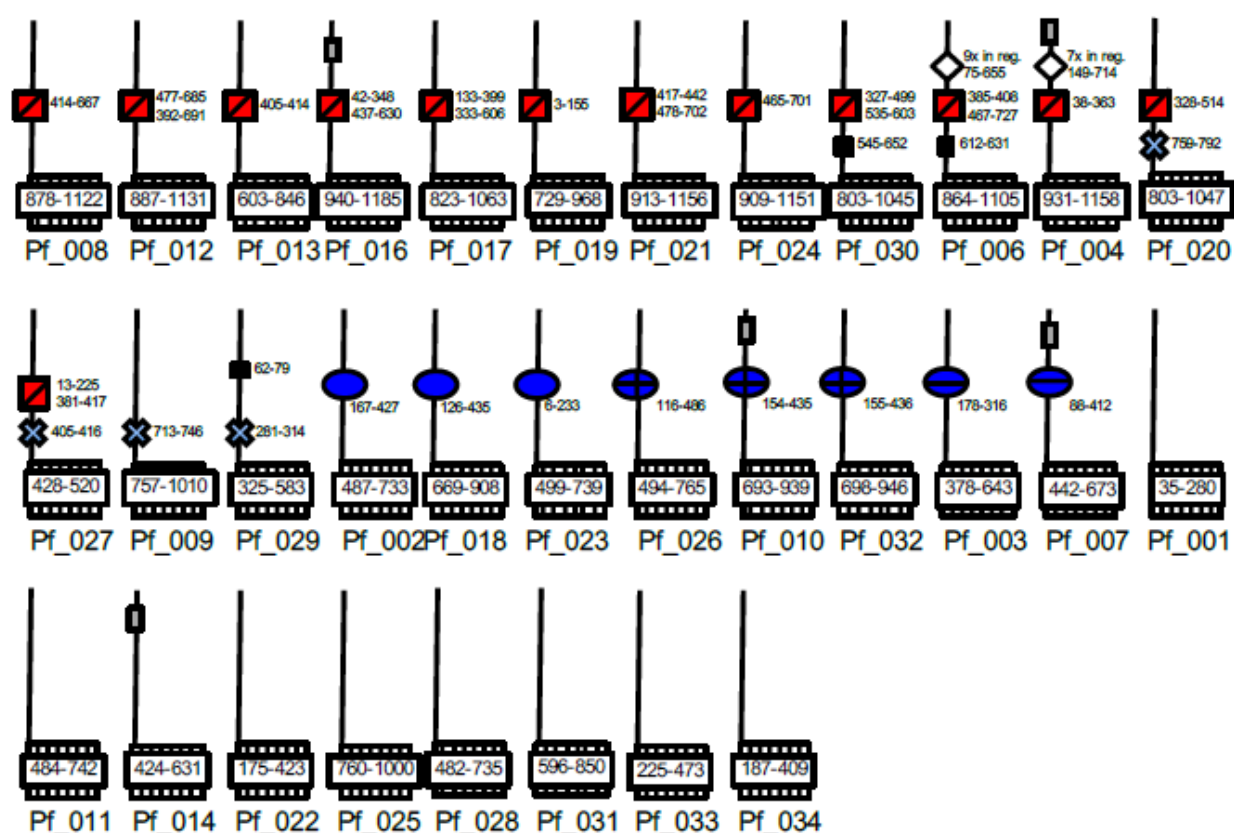

Supplement: Supplementary file [file 7234106]
